# Supplementary material for: Influence of electronic and steric effects of substituted ligands coordinated to Ir(iii) complexes on the solution processed OLED properties
Source: Royal Society of Chemistry journal article supplement (doi:10.1039/c5tc01278c), 2015-01-01
Supplement: c5tc01278c1.pdf [file c5tc01278c1.pdf]

## Electronic Supplementary Information (ESI)

### **Influence of electronic and steric effects of substituted ligands coordinated to Ir(III) complexes on the solution processed OLED properties**

Wojciech Mróz <sup>a\*</sup>, Roberta Ragni <sup>b\*</sup>, Francesco Galeotti <sup>a</sup>, Ernesto Mesto <sup>c</sup>, Chiara Botta <sup>a</sup>, Luisa De Cola <sup>d</sup>, Gianluca Maria Farinola <sup>b</sup> and Umberto Giovanella <sup>a</sup>

<sup>a</sup> ISMAC-CNR, Via Bassini 15, 20133 Milano, Italy.

<sup>b</sup> Dipartimento di Chimica, Università degli Studi di Bari "Aldo Moro", Via Orabona 4, 70126 Bari, Italy.

<sup>c</sup> Dipartimento di Geologia, Università degli Studi di Bari "Aldo Moro", Via Orabona 4, 70126 Bari, Italy.

<sup>d</sup> Institut de Science et d'Ingénierie Supramoléculaires, Université de Strasbourg & CNRS, 8 allée Gaspard Monge, 67083 Strasbourg Cedex, France.

E-mail: w.mroz@ismac.cnr.it, roberta.ragni@uniba.it

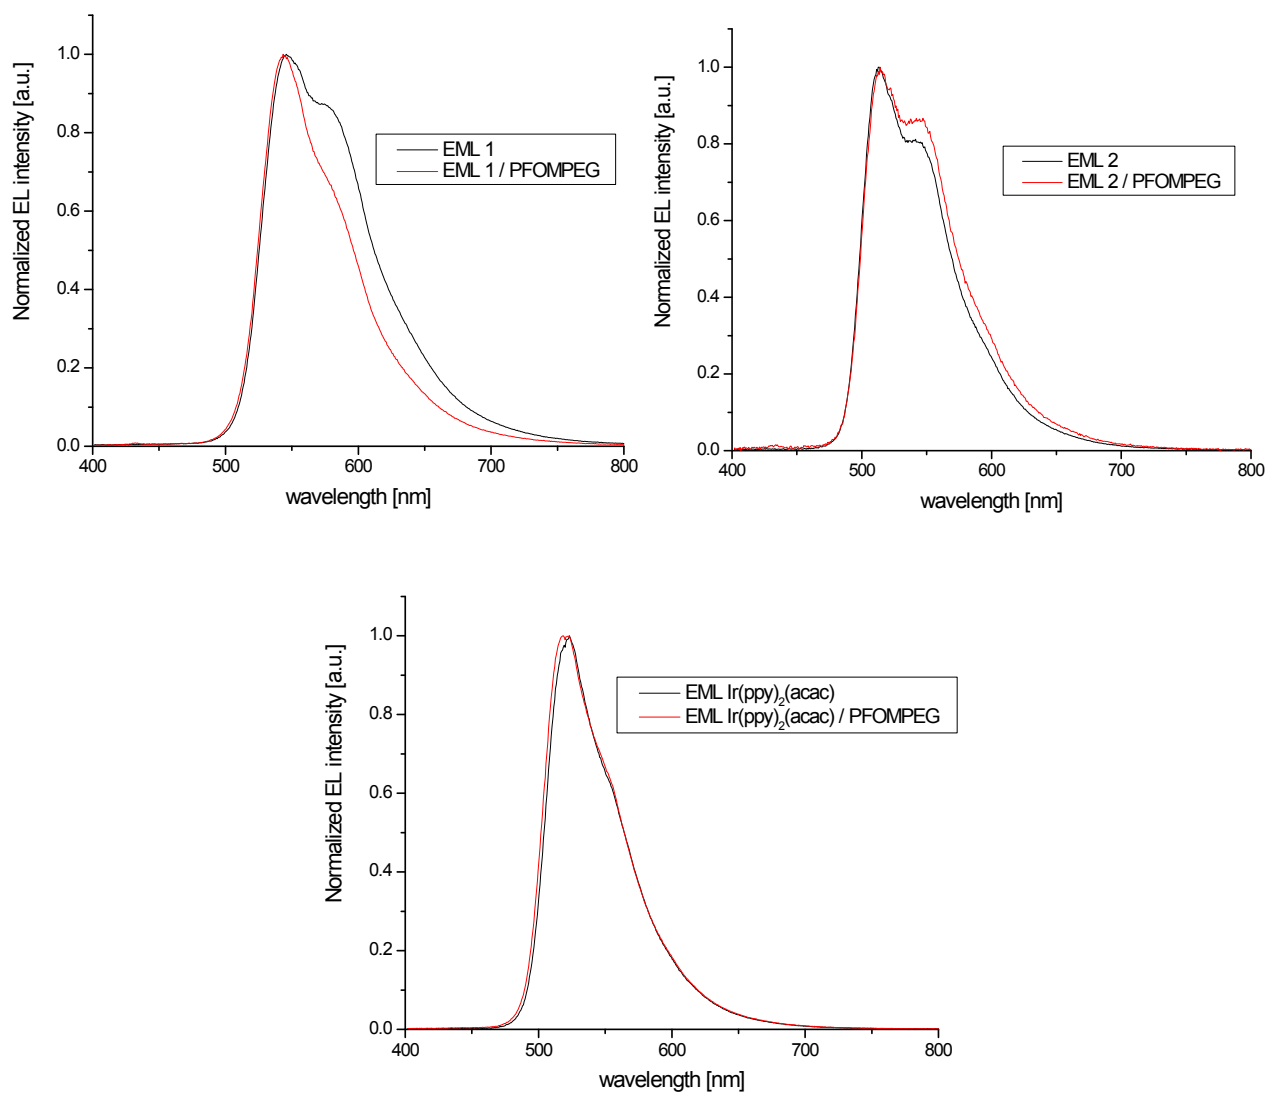

**Fig. S1.** Comparison of EL spectra of all devices

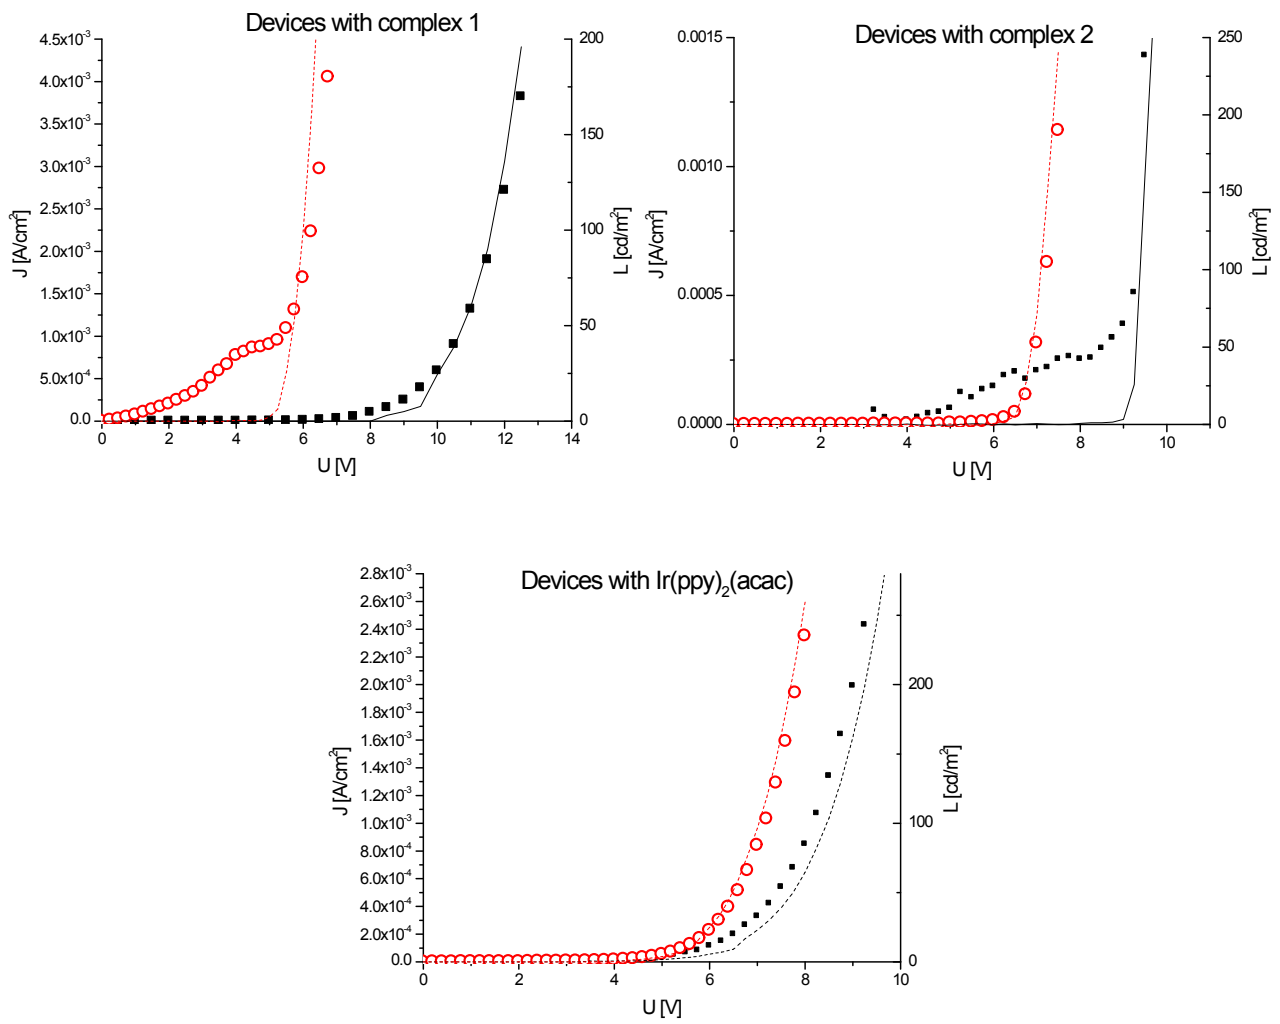

**Fig. S2.** J-V-L plots of devices with structures ITO/PEDOT:PSS/65% PVK : 30% OXD7 : 5% Ir complex /Ba/Al (black) and ITO/PEDOT:PSS/65% PVK : 30% OXD7 : 5% Ir complex/PFOMPEG /Ba/Al (red). Points represent current density (J) and lines luminance (L).
